# Supplementary material
Source: PubMed Central journal article supplement (PMC3387563)
Supplement: NIHMS289431-supplement-2.pdf [file NIHMS289431-supplement-2.pdf]

Supplementary online material to:

Inhibition of Notch signaling ameliorates insulin resistance in a FoxO1–dependent manner

Utpal B. Pajvani<sup>1</sup>, Carrie J. Shawber<sup>2</sup>, Varman T. Samuel<sup>3</sup>, Andreas L. Birkenfeld<sup>3</sup>, Gerald I. Shulman<sup>3</sup>, Jan Kitajewski<sup>2</sup> and Domenico Accili<sup>1</sup>

Departments of <sup>1</sup>Medicine and <sup>2</sup>Pathology and Obstetrics and Gynecology, Columbia University, New York, New York, <sup>3</sup>Department of Internal Medicine, Yale University, New Haven, Connecticut

Correspondence should be addressed to D.A. (da230@columbia.edu)

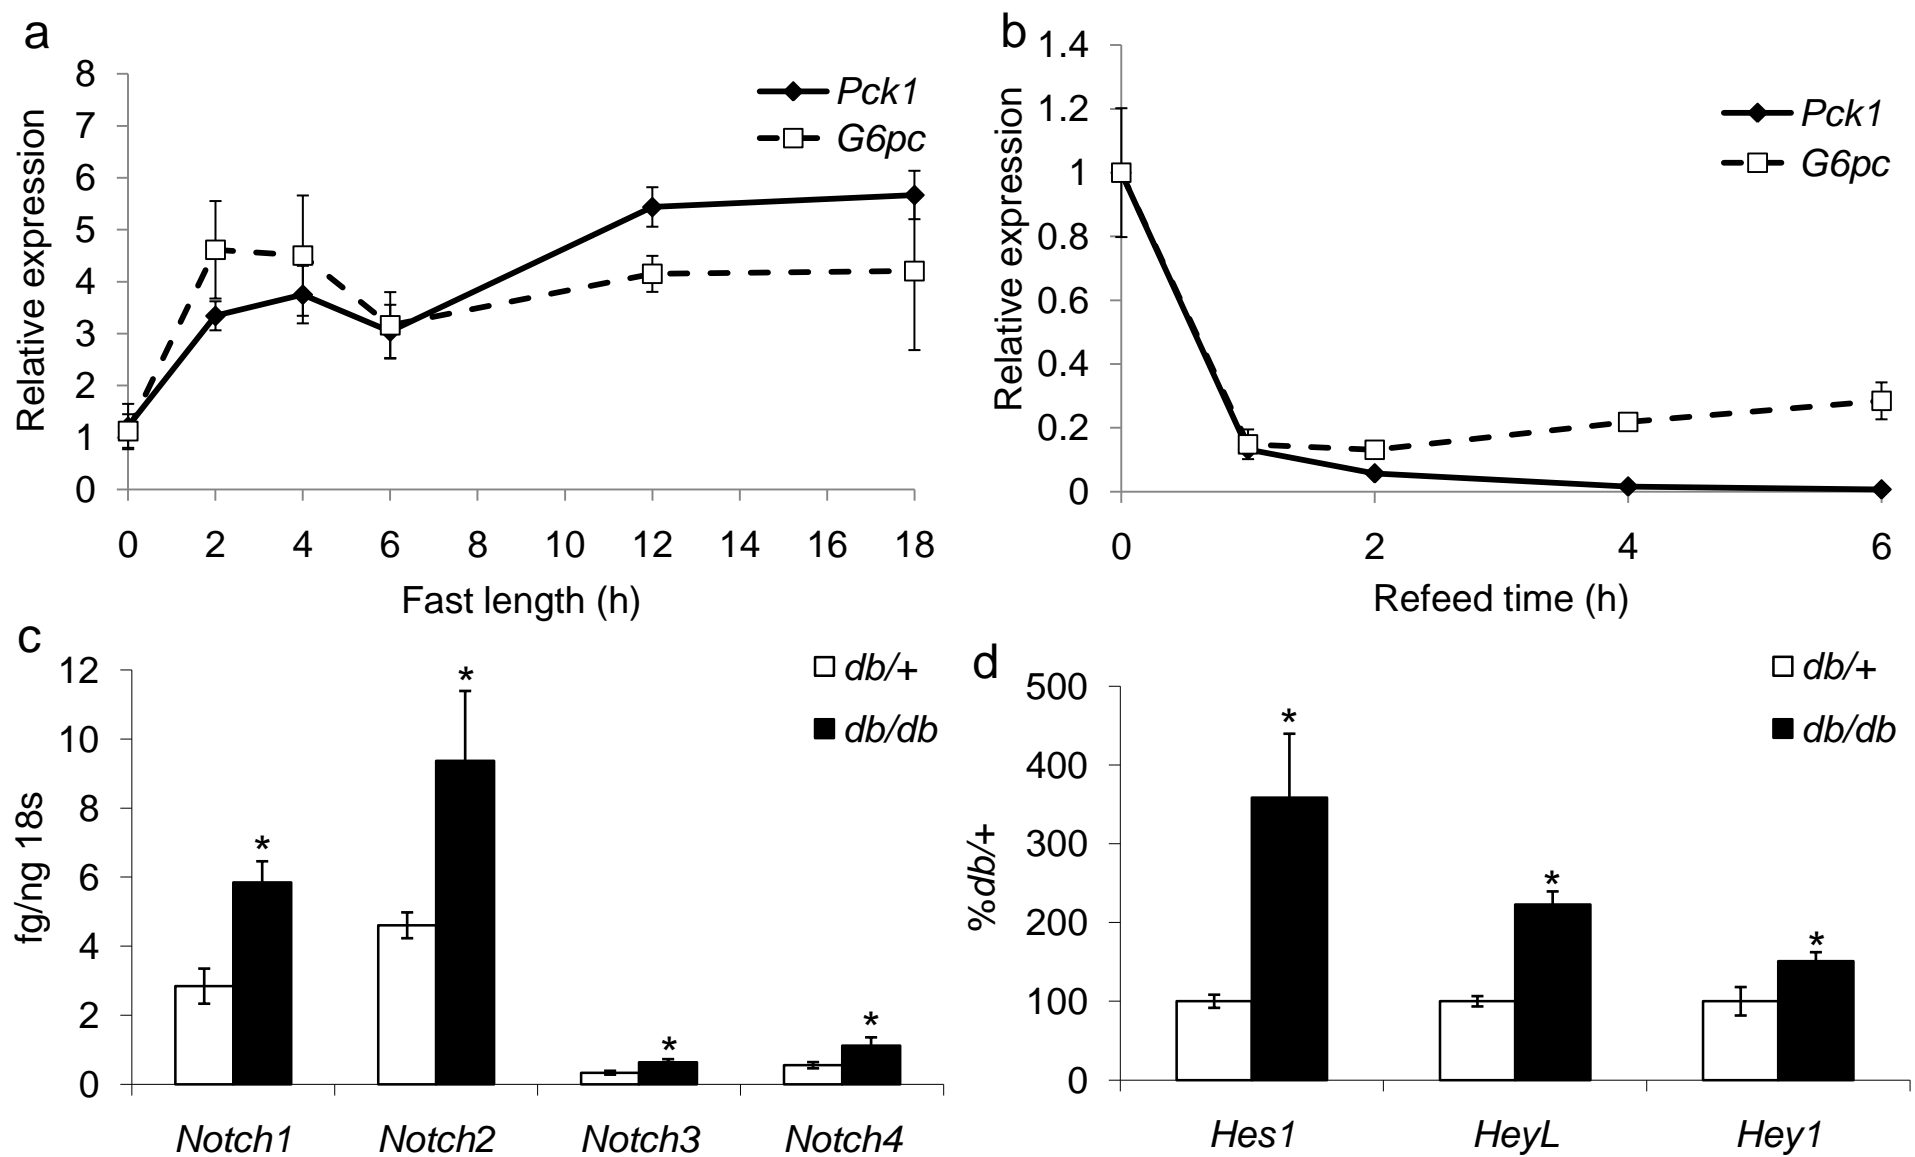

**Supplementary Figure 1** Hepatic gene expression of gluconeogenic genes *G6pc* and *Pck1*, demonstrating (a) induction with fasting and (b) repression with refeeding. Increased (c) Notch receptor and (d) Notch target gene expression in ad lib, 8wk old male, *db/db* animals as compared to *db/+* control littermates. \* $P < 0.05$  vs. *db/+* (n = 5 for each genotype).

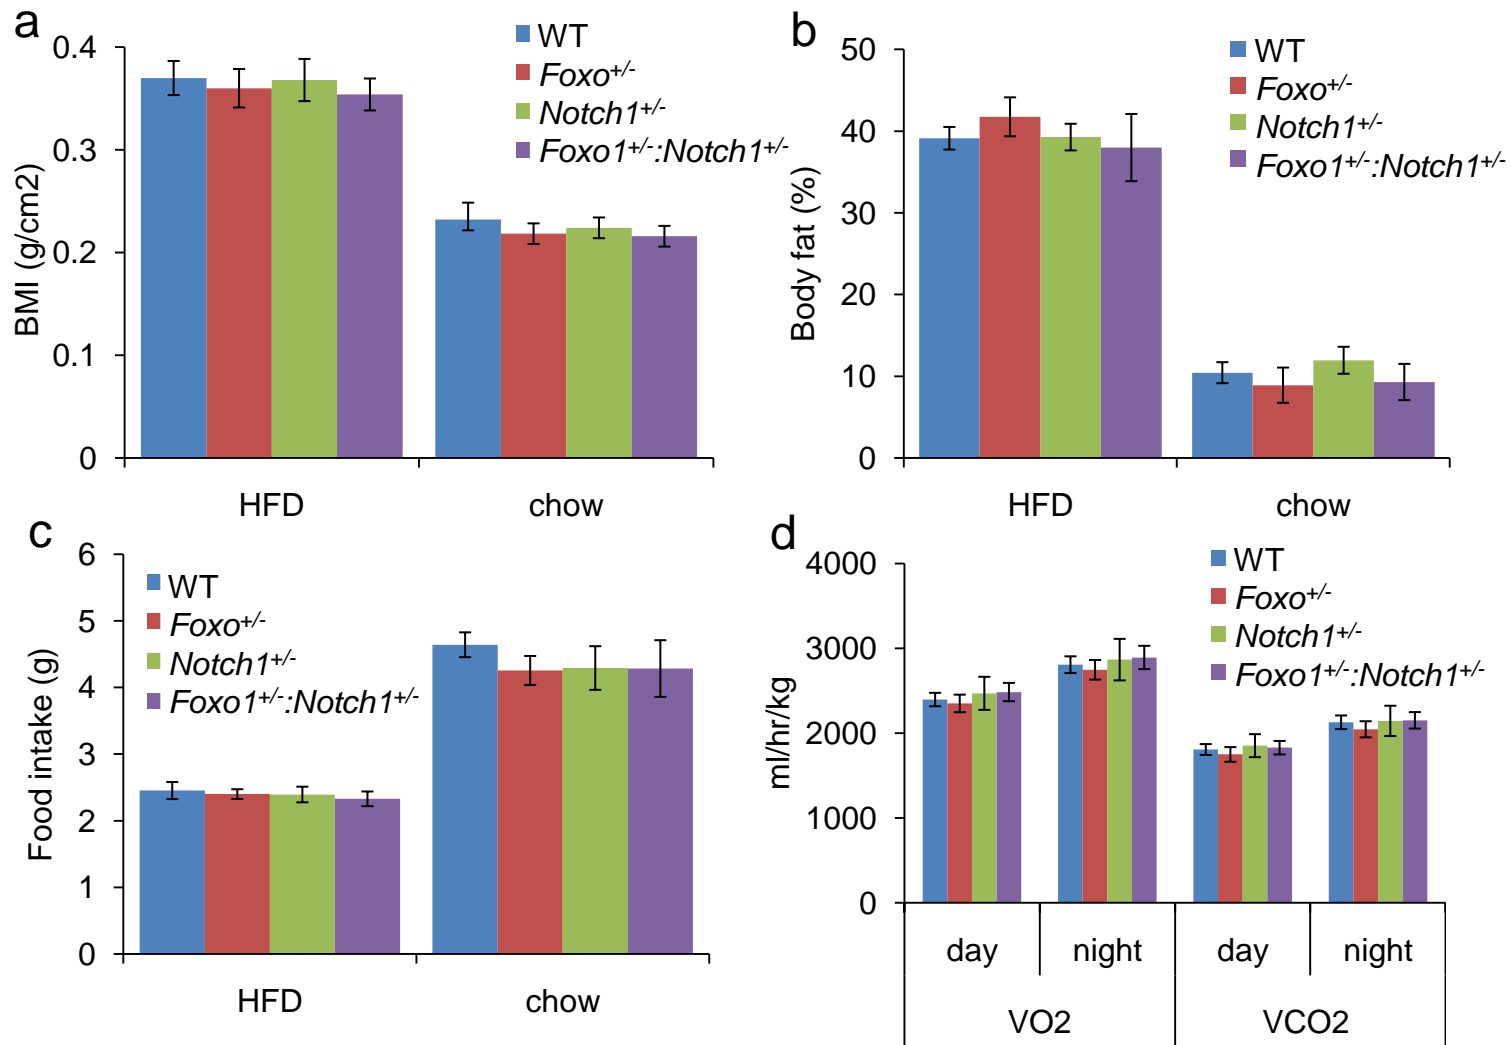

**Supplementary Figure 2** Metabolic characterization of *Foxo1*<sup>+/-</sup>, *Notch1*<sup>+/-</sup> and *Foxo1*<sup>+/-</sup>:*Notch1*<sup>+/-</sup> mice. (a) Body mass index, (b) Body fat assessed by MRI, (c) 24hr food intake, and (d) indirect calorimetry in mice weaned to either HFD (left panels) or chow (right panels).

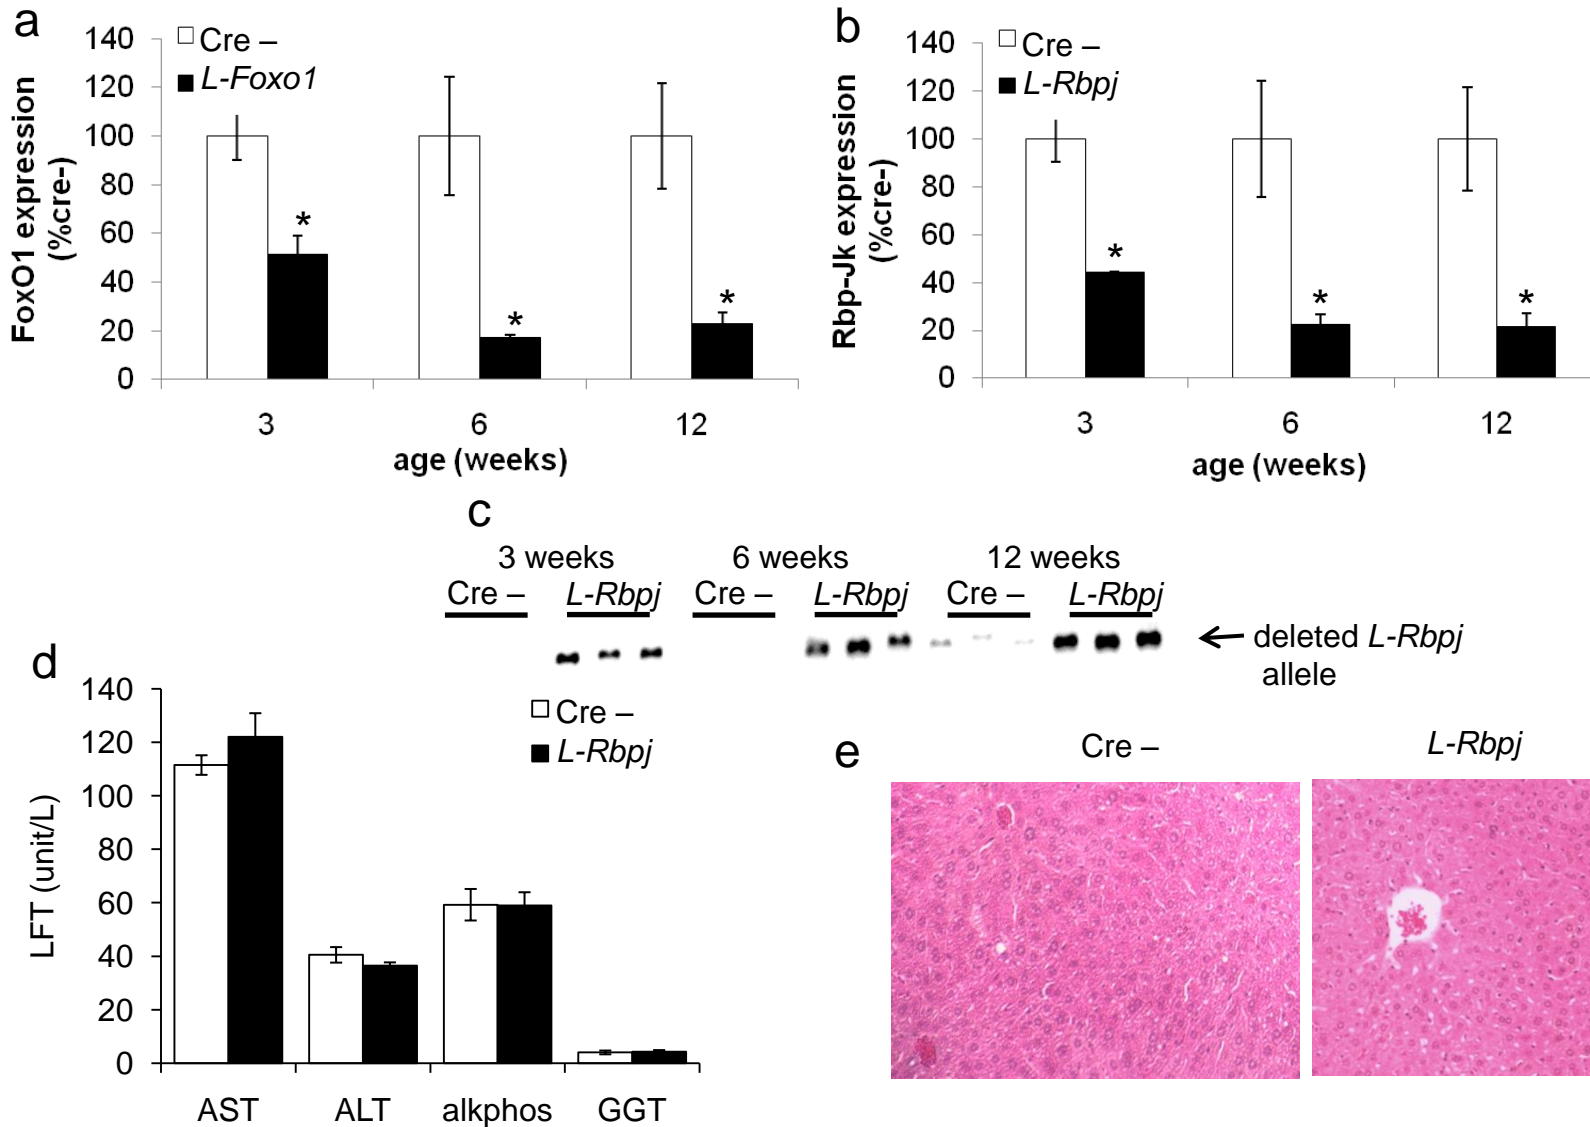

**Supplementary Figure 3** Albumin-cre-driven, age-dependent Rbp-Jk and FoxO1 deletion. (a) *Foxo1* and (b) *Rbpj* levels analyzed by quantitative PCR in *L-Foxo1*, *L-Rbpj* and Cre - control animals at different ages. (c) PCR amplification of genomic DNA to detect the deleted *Rbpj* allele at different ages. (d) Liver function tests and (e) H&E staining from 16-wk old, chow-fed *L-Rbpj* and control (Cre -) male mouse livers [normal values: AST (54-298U/L), ALT (17-77U/L), alkaline phosphatase (35-96U/L), GGT (2-12U/L)]. \**P*<0.05 vs. Cre - (n = 4-6 for each genotype).

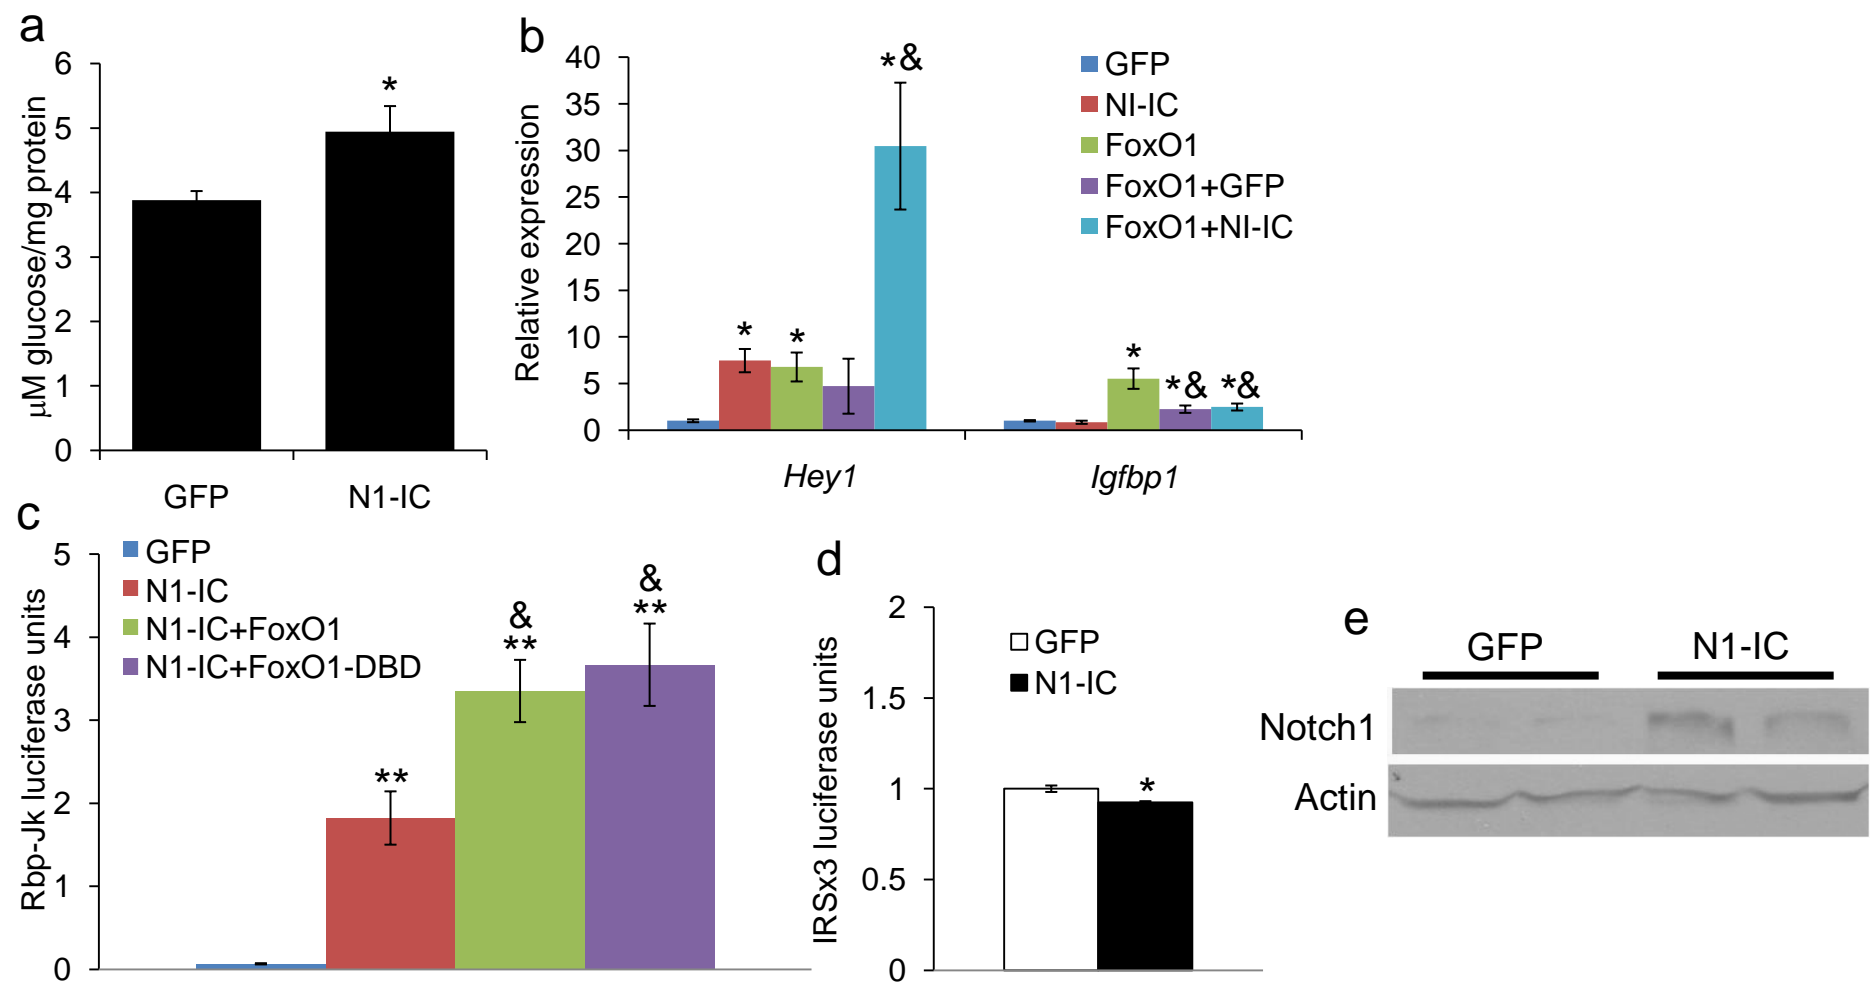

**Supplementary Figure 4** FoxO1 and Notch1 coordinately regulate Notch targets but not FoxO1 targets. **(a)** Glucose production measured in primary hepatocytes 24-hr post-transduction of GFP or N1-IC adenovirus (n = 4). One representative experiment of three carried out is shown. **(b)** Expression of *Hey1* and *Igfbp1* in primary hepatocytes from 12-wk old male mice, transduced with GFP, N1-IC, FoxO1-ADA (FoxO1) or combinations thereof (total MOI=5). **(c)** Luciferase reporter assays after transfection of HepG2 cells with plasmid encoding a 3x Rbp-Jk binding site (PGI3-11 Csl), followed by transduction with GFP, N1-IC, FoxO1-ADA (FoxO1) or FoxO1-ADA-DBD (FoxO1-DBD). **(d)** Luciferase reporter assays after transient transfection of Hepa1c1c7 cells with plasmid encoding a 3x FoxO1 binding site, followed by transduction with either GFP or N1-IC. **(e)** Immunoblot analysis of hepatic Notch1 5 days after tail vein injection of N1-IC or GFP adenoviruses. \* $P < 0.05$  and \*\* $P < 0.01$  vs. GFP; & $P < 0.05$  vs. FoxO1 or N1-IC alone.

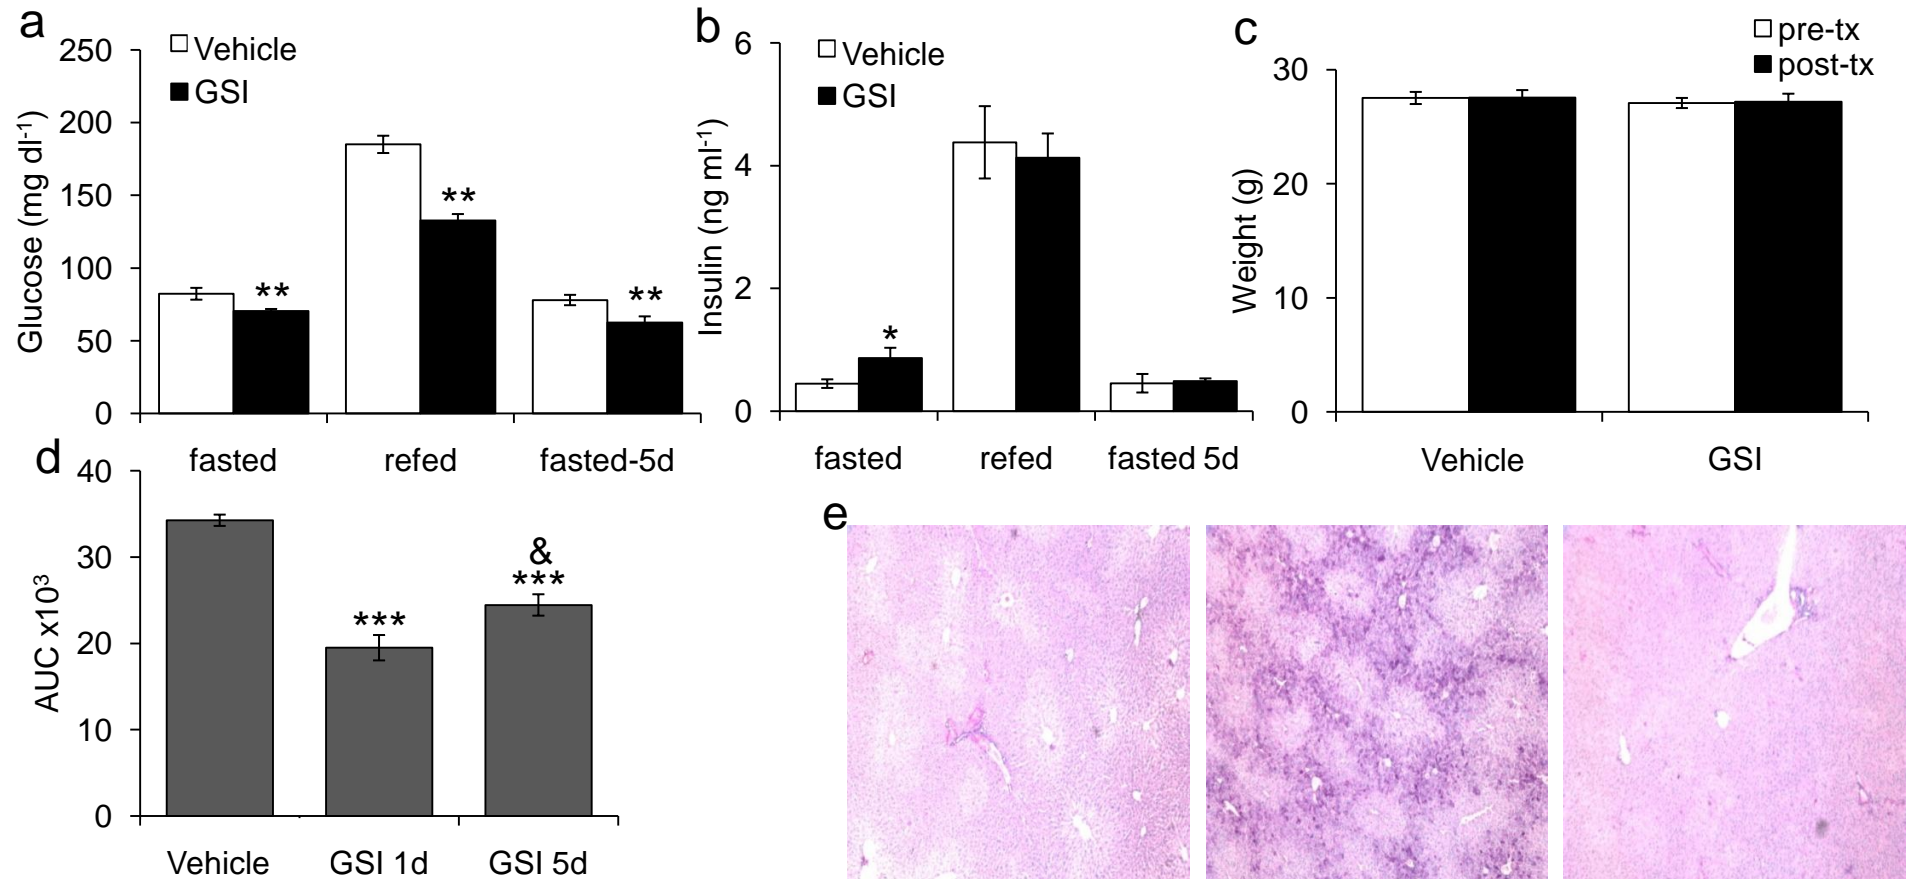

**Supplementary Figure 5** Effects of GSI on body weight, metabolic parameters and intestinal morphology in lean mice. **(a)** Glucose and **(b)** insulin levels in 16-hr fasted or 16-hr fasted/2-hr refed, 8-wk-old lean mice treated with either vehicle, single-dose GSI (GSI 1d) or GSI dosed daily for 5 days (GSI 5d). **(c)** Body weight of 8-wk-old lean mice before and after five daily doses of vehicle or GSI. **(d)** AUC of IPGTT in 8-wk-old *C57BL6* mice following single dose (GSI 1d) or 5-day GSI course (GSI 5d). **(e)** PAS staining of liver from fasted 8-wk-old *C57BL6* mice, demonstrating that 1-day GSI treatment results in impaired glycogenolysis. **(f)** H&E stain of small intestine demonstrating intestinal metaplasia and increased goblet cells in mice treated with five daily doses of GSI. \* $P < 0.05$ , \*\* $P < 0.01$ , \*\*\* $P < 0.001$  vs. vehicle ( $n = 6$  for each treatment).

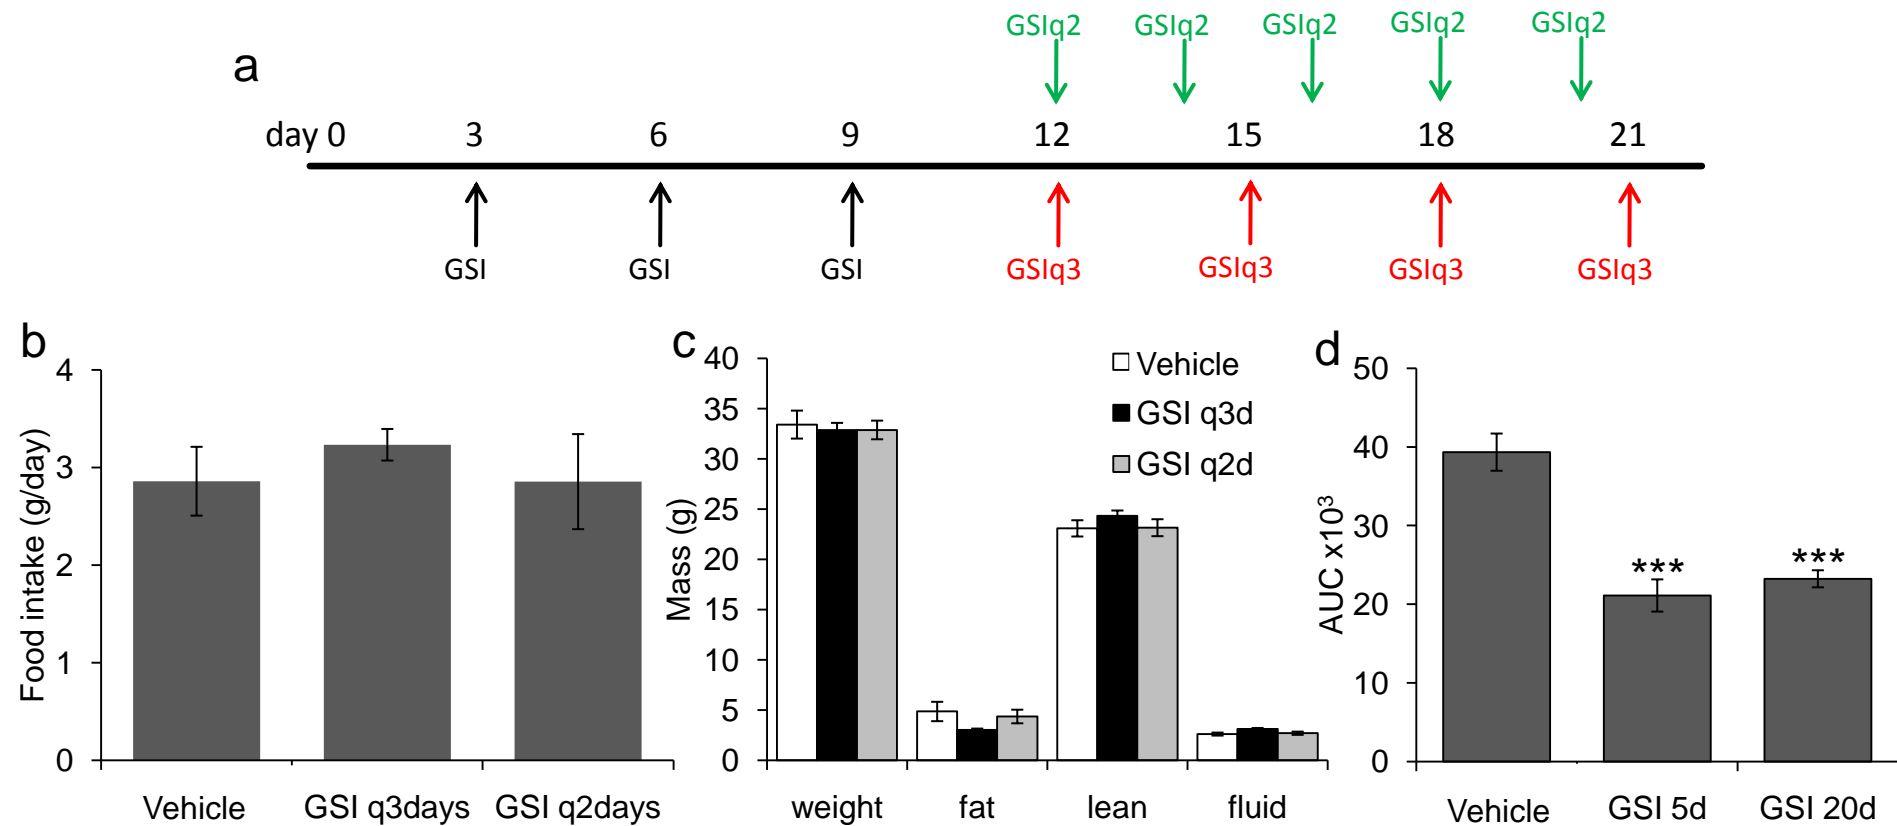

**Supplementary Figure 6** Effects of chronic GSI treatment on food intake, body weight and composition in DIO mice. Mice were treated every 3 (GSI q3days) or 2 (GSI q2days) days with GSI or vehicle as per dosing scheme illustrated in (a). Food intake (b) and body weight/composition (c) after chronic, intermittent treatment with GSI. (d) AUC of IPGTT in DIO mice with either 5 consecutive days (GSI 5d) or every third day for 20 days (GSI 20d) of GSI or vehicle. \* $P < 0.05$ , \* $P < 0.01$ , \*\*\* $P < 0.001$  vs. vehicle ( $n = 6$  for each treatment).

**Supplementary Table 1** Adipose tissue distribution and serum adiponectin

|                                                               | length (mm) | body wt (g) | BMI<br>(g/cm <sup>2</sup> ) | fat pad wt<br>(g) | adiponectin<br>(μg/ml) | adipocyte<br>area(μm <sup>2</sup> ) |
|---------------------------------------------------------------|-------------|-------------|-----------------------------|-------------------|------------------------|-------------------------------------|
| WT                                                            | 10.88±0.04  | 43.84±2.29  | 0.37±0.02                   | 0.96±0.06         | 15.45±0.65             | 5430±486                            |
| <i>Foxo1</i> <sup>+/-</sup>                                   | 10.89±0.05  | 42.70±2.45  | 0.36±0.02                   | 1.25±0.12*        | 13.36±0.42*            | 5238±390                            |
| <i>Notch1</i> <sup>+/-</sup>                                  | 10.63±0.04* | 41.63±2.50  | 0.37±0.02                   | 1.00±0.08         | 15.32±1.05             | 5064±161                            |
| <i>Foxo1</i> <sup>+/-</sup><br>: <i>Notch1</i> <sup>+/-</sup> | 10.63±0.05* | 40.07±2.13  | 0.35±0.02                   | 1.26±0.11*        | 13.19±0.80*            | 5218±710                            |

Data show HFD-fed animals analyzed at 14-16 wks of age. \**P* < 0.05 vs. WT, N = 7-8 per genotype.



**Supplementary Table 2** Hyperinsulinemic-euglycemic clamps in HFD-fed WT, *Foxo1*<sup>+/-</sup> and *Foxo1*<sup>+/-</sup>:*Notch1*<sup>+/-</sup> mice

|                                                            | Basal glucose (mg/dl) | Basal insulin (ng/ml) | Clamped glucose (mg/dl) | Clamped insulin (ng/ml) | Basal HGP (mg/kg/min) | Glycolysis (mg/kg/min) | Glycogen synthesis (mg/kg/min) |
|------------------------------------------------------------|-----------------------|-----------------------|-------------------------|-------------------------|-----------------------|------------------------|--------------------------------|
| WT                                                         | 165±12                | 42.1±14.1             | 120±5                   | 154±16.3                | 10.2±0.8              | 17.7±2.3               | 3.1±1.3                        |
| <i>Foxo1</i> <sup>+/-</sup>                                | 155±6                 | 10.0±1.0*             | 118±1                   | 127±3.2                 | 8.7±0.4               | 27.5±2.6*              | -1.2±1.7                       |
| <i>Foxo1</i> <sup>+/-</sup> : <i>Notch1</i> <sup>+/-</sup> | 133±6*                | 7.8±0.5*              | 114±2                   | 130±7.6                 | 9.0±0.5               | 24.9±1.3*              | 8.6±2.2* &                     |

Data represent measured and calculated parameters from HFD-fed cohorts of WT, *Foxo1*<sup>+/-</sup> and *Foxo1*<sup>+/-</sup>:*Notch1*<sup>+/-</sup> mice. \**P* < 0.05 vs. WT, &*P* < 0.05 vs. *Foxo1*<sup>+/-</sup>, N = 6-8 per group.

**Supplementary Table 3** Hyperinsulinemic-euglycemic clamps in chow-fed *Foxo1*<sup>+/-</sup> and *Foxo1*<sup>+/-</sup>:*Notch1*<sup>+/-</sup> mice

|                                                            | Basal HGP<br>(mg/kg/min) | GIR<br>(mg/kg/min) | Clamped<br>HGP<br>(mg/kg/min) | Rd<br>(mg/kg/min) | Glycolysis<br>(mg/kg/min) | Glycogen<br>synthesis<br>(mg/kg/min) |
|------------------------------------------------------------|--------------------------|--------------------|-------------------------------|-------------------|---------------------------|--------------------------------------|
| <i>Foxo1</i> <sup>+/-</sup>                                | 10±0.9                   | 62.8±1.9           | -10.1±2.2                     | 52.6±2.6          | 24.2±1.9                  | 28.4±2                               |
| <i>Foxo1</i> <sup>+/-</sup> : <i>Notch1</i> <sup>+/-</sup> | 9.9±0.7                  | 59.7±2.9           | -8.7±1.9                      | 51±1.6            | 24±1.0                    | 26.9±1.7                             |

Measured and calculated parameters from chow-fed cohorts of *Foxo1*<sup>+/-</sup> and *Foxo1*<sup>+/-</sup>:*Notch1*<sup>+/-</sup> mice. \**P* < 0.05 vs. *FoxO1*<sup>+/-</sup>, N = 6 per group.

**Supplementary Table 4** Quantitative PCR analysis primer sequences

|               | Sense                      | Antisense                 |
|---------------|----------------------------|---------------------------|
| <i>18s</i>    | AAACGGCTACCACATCCAAG       | CCTCCAATGGATCCTCGTTA      |
| <i>Foxo1</i>  | GCGTGCCCTACTTCAAGGATAA     | TCCAGTTCCTTCATTCTGCACT    |
| <i>Notch1</i> | ATGTGGATGCTGCTGTTGTGCTCC   | CCGGTTGGCAAAGTGGTCCA      |
| <i>G6pc</i>   | GTCTGGATTCTACCTGCTAC       | AAAGACTTCTTGTGTGTCTGTC    |
| <i>Pck1</i>   | CCTGGAAGAACAAGGAGTGG       | AGGGTCAATAATGGGGCACT      |
| <i>Igfbp1</i> | AGATCGCCGACCTCAAGAAAT      | CTCCAGAGACCCAGGGATTTT     |
| <i>Irs2</i>   | TCCAGAACGGCCTCAACTAT       | AGTGATGGGACAGGAAGTCG      |
| <i>Hes1</i>   | CACTGATTTTGGATGCACTTAAGAAG | CCGGGGTAGGTCATGGCGTTGATCT |
| <i>Hey1</i>   | ACGAGAATGGAACTTGAGTTC      | AACTCCGATAGTCCATAGCAAG    |
| <i>Heyl</i>   | TCTGAATTGCGACGATTGGTCCCC   | CCAGGGCTCGGGCATCAAAGAA    |
| <i>Rbpj</i>   | GCGATGACATTGGTGTGTCC       | ATACAGGGTCGTCTGCATCC      |

**Supplementary Table 5** Genotyping primer sequences

|                              | sense                      | antisense                  |
|------------------------------|----------------------------|----------------------------|
| <i>Foxo1</i> (ko)            | ACTTCCAGTTCAACATCAGCCG     | TTCCCGCTTCAGTGACAACGTC     |
| <i>Notch1</i> (wt)           | TCTAAGTGCTCCGAGGAGATCA     | CAGGGGTTGGAGAGACATTCATTG   |
| <i>Notch1</i> (ko)           | GGGTTGGAGAGACATTCATTG      | TCGCCTTCTATCGCCTTCTTG      |
| <i>Cre</i> (universal)       | ACCTGAAGATGTTTCGCGATTATCT  | ACCGTCAGTACGTGAGATATCTT    |
| <i>Rbpj</i> <sup>flox</sup>  | GAAGGTCGGTTGACACCAGATAGC   | GCAATCCATCTTGTTCAATGGCC    |
| <i>Rbpj</i> (wt)             | GTTCTTAACCTGTTGGTCGGAACC   | GCTTGAGGCTTGATGTTCTGTATTGC |
| <i>Foxo1</i> <sup>flox</sup> | GCTTAGAGCAGAGATGTTCTCACATT | CCAGAGTCTTTGTATCAGGCAAATAA |
